# Supplementary material
Source: PubMed Central journal article supplement (PMC8548994)
Supplement: NIHMS1630416-supplement-1.pdf [file NIHMS1630416-supplement-1.pdf]

**Supplemental Table 1.** Multivariate Cox proportional hazards model analysis of risk factors in patients undergoing cataract surgery with iStent using 2 different methods for defining baseline IOP and medications. Method 1 is the average of all available IOP and medication use data up to 1 year before the procedure. Method 2 is the IOP and medications being uses on the last visit before the procedure.

|                                                    | Method 1     |                     |               | Method 2     |                     |              |
|----------------------------------------------------|--------------|---------------------|---------------|--------------|---------------------|--------------|
|                                                    | Hazard ratio | Confidence interval | p value       | Hazard ratio | Confidence interval | p value      |
| Age (1 year)                                       | 1.04         | 0.98-1.10           | 0.22          | 1.00         | 0.93-1.08           | 0.94         |
| Race (Caucasian)                                   | 8.75         | 2.80-27.31          | <b>0.0002</b> | 8.80         | 2.33-33.23          | <b>0.001</b> |
| Pre-operative IOP (1 mmHg)                         | 1.06         | 0.88-1.29           | 0.52          | 0.93         | 0.78-1.12           | 0.46         |
| Pre-operative number of medications (1 medication) | 0.63         | 0.33-1.21           | 0.16          | 0.64         | 0.37-1.10           | 0.16         |
| Axial length (1 mm)                                | 1.61         | 1.05-2.47           | <b>0.03</b>   | 1.70         | 1.04-2.79           | <b>0.03</b>  |
