# Supplementary material
Source: PubMed Central journal article supplement (PMC8548994)
Supplement: NIHMS1630416-supplement-2.pdf [file NIHMS1630416-supplement-2.pdf]

**Supplemental Table 2.** Multivariate Cox proportional hazards model analysis of risk factors in patients undergoing cataract surgery alone using 2 different methods for defining baseline IOP and medications. Method 1 is the average of all available IOP and medication use data up to 1 year before the procedure. Method 2 is the IOP and medications being uses on the last visit before the procedure.

|                               | Method 1     |                     |              | Method 2     |                     |              |
|-------------------------------|--------------|---------------------|--------------|--------------|---------------------|--------------|
|                               | Hazard ratio | Confidence interval | p value      | Hazard ratio | Confidence interval | p value      |
| Race (Caucasian)              | 0.50         | 0.13-1.91           | 0.31         | 0.80         | 0.20-3.28           | 0.76         |
| Pre-operative IOP (1 mmHg)    | 0.87         | 0.74-1.02           | 0.09         | 0.92         | 0.80-1.07           | 0.30         |
| Keratometry (1 diopter)       | 1.74         | 1.15-2.62           | <b>0.008</b> | 1.60         | 1.09-2.34           | <b>0.02</b>  |
| Axial length (1 mm)           | 1.58         | 1.10-2.29           | <b>0.01</b>  | 1.51         | 1.05-2.19           | <b>0.03</b>  |
| Anterior chamber depth (1 mm) | 0.22         | 0.07-0.68           | <b>0.008</b> | 0.23         | 0.09-0.60           | <b>0.003</b> |
